# Supplementary material
Source: Springer Nature journal article supplement (https://www.springermedizin.de/resource/supplementary/13058_2011_3159_MOESM8_ESM.pdf/9703330)

**A.**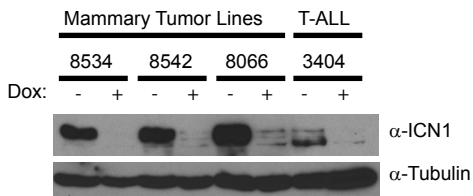**B.**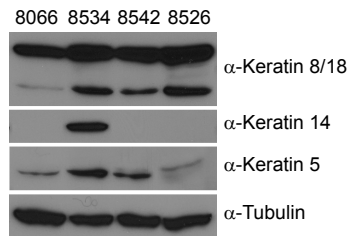**C.**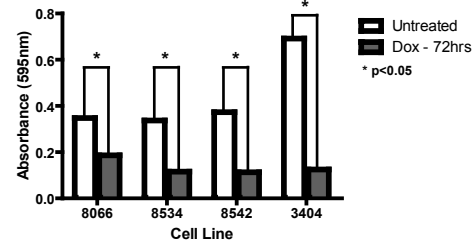**D.**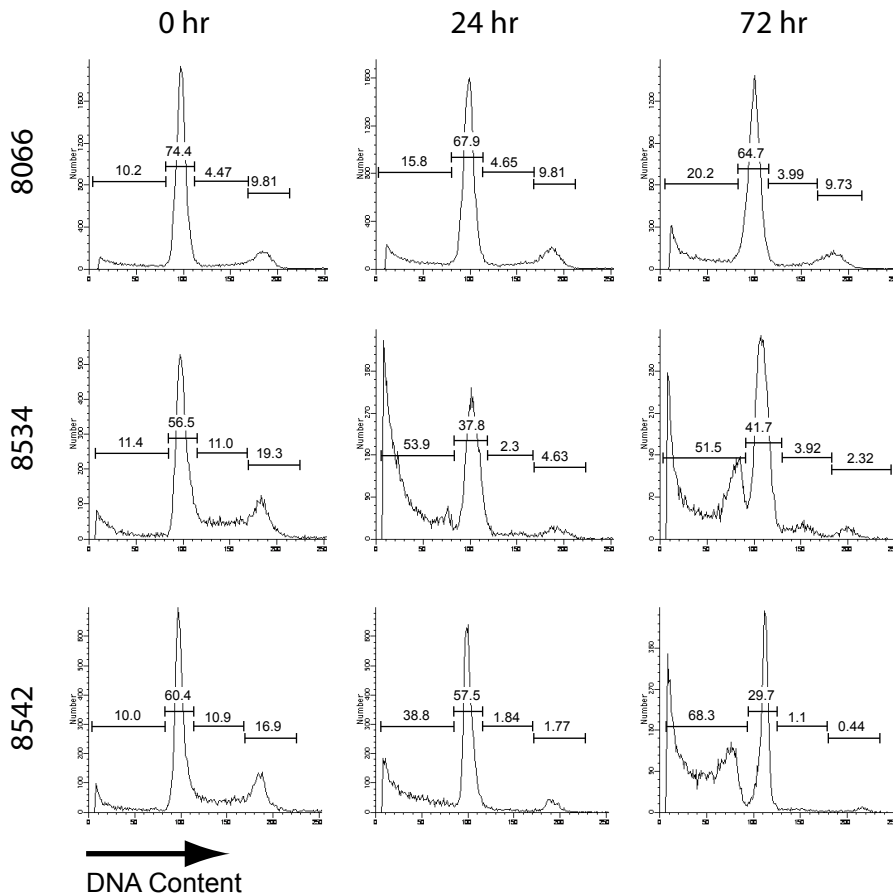**E.**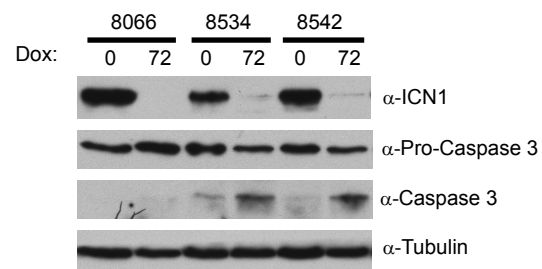

Supplement: MOESM8 [file 9703330]
